# Supplementary material for: Molecular and environmental analysis of Campania (Italy) sweet cherry (Prunus avium L.) cultivars for biocultural refugia identification and conservation
Source: PubMed Central journal article supplement (PMC6494815; doi:10.1038/s41598-019-43226-2), 2019-05-01
Supplement: 41598_2019_43226_MOESM1_ESM.pdf [file 41598_2019_43226_MOESM1_ESM.pdf]

**Molecular and environmental analysis of Campania (Italy) sweet cherry (*Prunus avium* L.) cultivars for biocultural refugia identification and conservation**

Livio Muccillo, Vittorio Colantuoni, Rosaria Sciarrillo, Giuseppe Baiamonte, Giovanni Salerno, Mario Marziano, Lina Sabatino\*, Carmine Guarino\*

## SUPPLEMENTARY FIGURES AND TABLES

Supplementary Figure S1

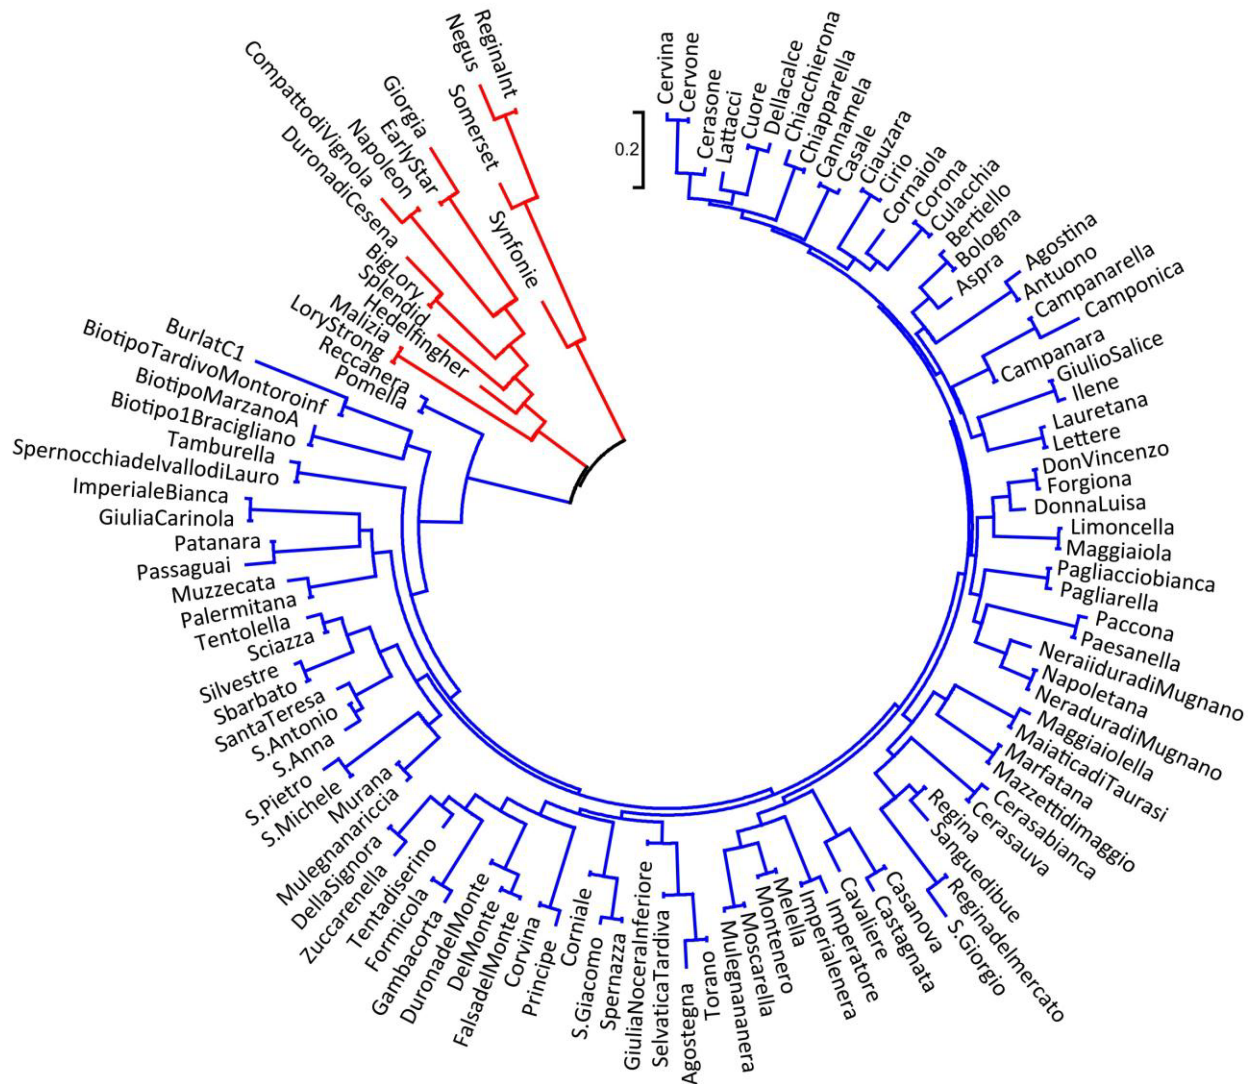

Supplementary Figure S1. Genetic relationships of Campania sweet cherry cultivars with

International reference cultivars. The dendrogram was inferred using the the UPGMA method <sup>56</sup>.

## Supplementary Figure S2

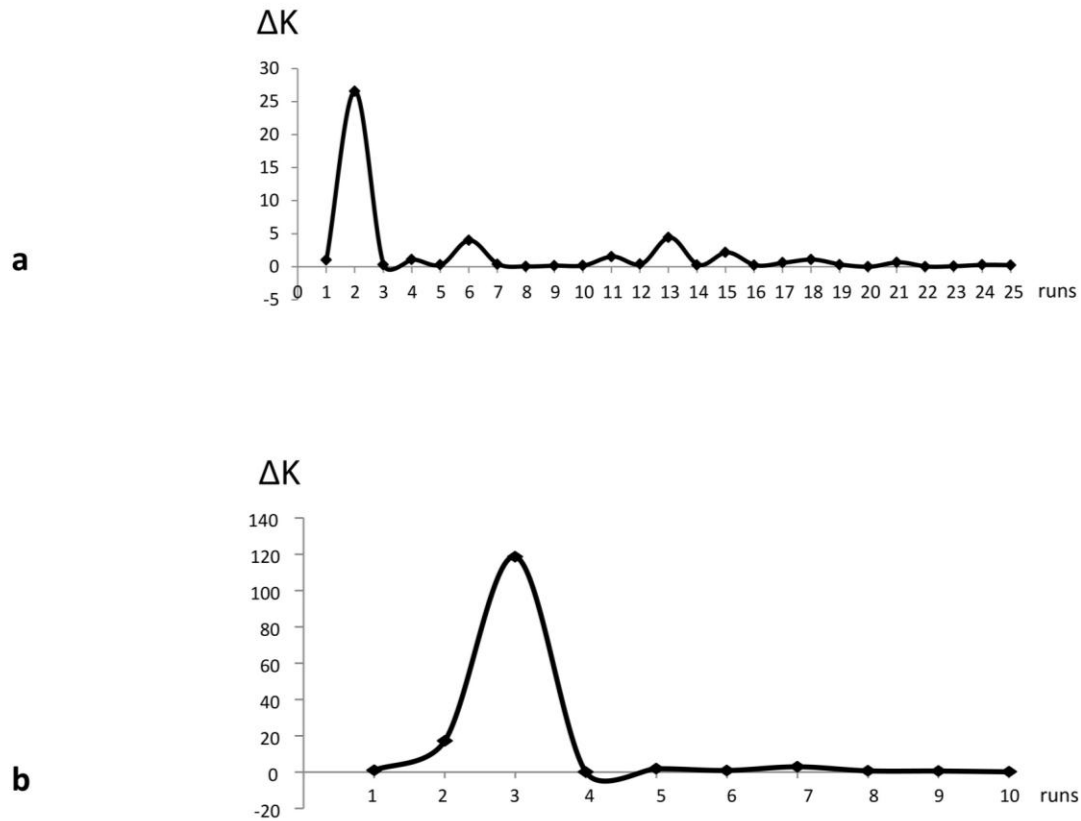

**Supplementary Figure S2. Graph representation of the  $\Delta K$  values obtained using STRUCTURE analysis.**

**(a)** Best  $\Delta K=2$  was obtained with a burning period ranging from 5000 to 50000 with biased k from 1 to 25; **(b)** Best  $\Delta K=3$  was obtained with a burning period ranging from 500000 to 750000 with biased k from 1 to 10.

### Supplementary Figure S3

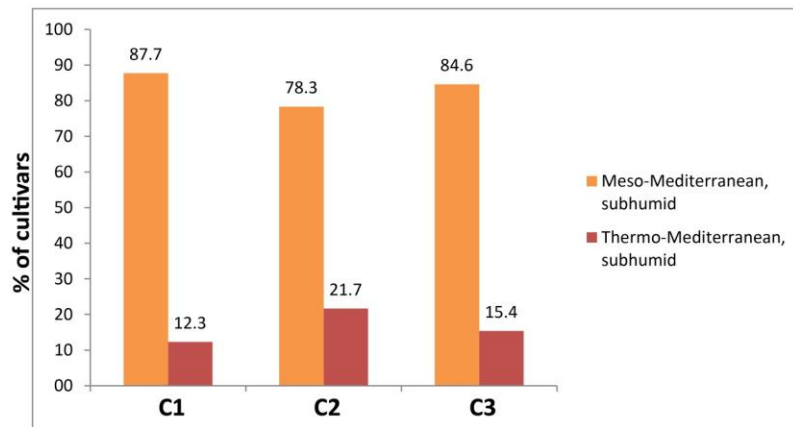

### Supplementary Figure S3. Correlation of sweet cherry varieties' locations with bioclimate distribution.

83,5% of the analysed samples are exposed to the Meso-Mediterranean and the remaining 16,5% to the Thermo-Mediterranean bioclimate.



## Supplementary Table S1

| Locus   | Accession No. | Repeat motif                                                   | Forward and Reverse primer sequences (5'-3')                | Size range (bp) |
|---------|---------------|----------------------------------------------------------------|-------------------------------------------------------------|-----------------|
| EMPA001 | AJ564644      | [AG] <sub>4</sub> GGGT[AG] <sub>26</sub>                       | F: FAM-GCTCTGCTGCTTCAACCATT<br>R: TTCCAACACATTACCCC         | 144-164         |
| EMPA004 | AJ564647      | [GA] <sub>4</sub> AA[GA] <sub>4</sub> AA[GA] <sub>15</sub>     | F: NED-TACGGTAGGCTTCTGCAAGG<br>R: TTGGCAGCCAACAAAATCA       | 168-192         |
| EMPA005 | AJ564648      | [CT] <sub>2</sub> CAT[CT] <sub>12</sub> T[AC] <sub>23</sub>    | F: PET-TGGGTTTGAGCAATATGCAA<br>R: CACCAATACACATGCACACG      | 160-264         |
| EMPA011 | AJ564654      | [AG] <sub>16</sub>                                             | F: VIC-TGTGCTCACTCTCTGCTGCT<br>R: TGTGTGGGGTTCACAGTCTCC     | 222-256         |
| EMPA018 | AJ564661      | [AG] <sub>18</sub>                                             | F: FAM-TCCAAGAACAAGCCAAAATC<br>R: AATTTCAATGATTCTGGATAG     | 79-111          |
| EMPA015 | AJ56458       | [GA] <sub>32</sub>                                             | F: NED-TTTTGGTCAATCTGCTGCTG<br>R: CTCTCATCTTCCCCTCCTC       | 193-252         |
| EMPA012 | AJ56455       | [AG] <sub>13</sub>                                             | F: PET-TGTGTGAAGGAAGCTTAAGAG<br>R: TGGCTGATTGGGGTTAAGTC     | 227-237         |
| EMPA506 | ay526622      | [CT] <sub>12</sub>                                             | F: VIC-AAGCGGAAGCACAGGTAG<br>R: TTGCTAGCATAGAAAAGAATTGTAG   | 190-226         |
| EMPA502 | ay526619      | [TTG] <sub>2</sub> CTGC[TG] <sub>10</sub> [AG] <sub>8</sub>    | F: FAM-CTACTTCCATGATTGCCTCAC<br>R: AACATCCAGAACATCAACACAC   | 134-148         |
| EMPA510 | ay526626      | [GA] <sub>28</sub>                                             | F: NED-GCTAATATCAAATCCCAGCTCTC<br>R: TGAAGAAGTATGGCTTCTGTGG | 154-191         |
| EMPA016 | AJ564659      | [AG] <sub>10</sub>                                             | F: PET-CCAAACCAATTACCCAGAG<br>R: GCCAATGTGCCAACCAATAAC      | 177-195         |
| EMPA513 | ay526629      | [TC] <sub>11</sub> [GT] <sub>3</sub> AT[GT] <sub>5</sub>       | F: VIC-GAATTGAAGCAACCAAGCAC<br>R: TGGCACACTCTACCTAACATTC    | 203-223         |
| EMPA512 | ay526628      | [TG] <sub>10</sub> A[GA] <sub>10</sub> AA[GA] <sub>13</sub>    | F: FAM-TGTGCTAATGCCAAAATACC<br>R: ACATGCATTTCAACCCACTC      | 123-149         |
| EMPA501 | ay526618      | [GA] <sub>9</sub> [GA] <sub>11</sub>                           | F: PET-CAAAATCAACAAAATCTAAACC<br>R: CAAGAAGTCTCTAGCTCAAACC  | 224-242         |
| EMPA514 | ay526630      | [TC] <sub>10</sub> CCAT[TC] <sub>3</sub> CCAT[TC] <sub>8</sub> | F: VIC-TCCGCATATCACAATCAAC<br>R: TTCCACACAAAACCAATCC        | 173-212         |

**Supplementary Table S1. List of the fifteen simple sequence repeats (SSRs) employed for genotyping the 113 cultivars, including nucleotide sequences, Accession No., repeat motifs and allelic size ranges (in bp).**



**Supplementary Table S2. List of the Campania's sweet cherry accessions analysed reporting the individual identification code (ID), related cultivar name (CV name), STRUCTURE individual number (STRUCTURE nr), cultivar number (CV nr) and all the amplified alleles of the SSRs loci as reported in Supplementary Table S1.**

## Supplementary Table S3

| Locus   | k    | N     | HExp  | HObs  | PIC   | PD    | P. A. | ARR   | F(Null) | Fis    | Fst   | Fit    |
|---------|------|-------|-------|-------|-------|-------|-------|-------|---------|--------|-------|--------|
| EMPA001 | 7    | 200   | 0,684 | 0,635 | 0,635 | 0,854 | 0     | ND    | 0,037   | -0.719 | 0.462 | 0.076  |
| EMPA004 | 7    | 204   | 0,687 | 0,657 | 0,628 | 0,753 | 2     | 0,286 | 0,028   | -0.716 | 0.494 | 0.131  |
| EMPA005 | 13   | 194   | 0,62  | 0,552 | 0,581 | 0,662 | 5     | 0,385 | 0,045   | -0.709 | 0.580 | 0.283  |
| EMPA011 | 10   | 197   | 0,185 | 0,107 | 0,180 | 0,412 | 4     | 0,400 | 0,260   | -0.796 | 0.821 | 0.678  |
| EMPA018 | 12   | 203   | 0,694 | 0,764 | 0,642 | 0,789 | 4     | 0,333 | -0,056  | -0.786 | 0.393 | -0.084 |
| EMPA015 | 19   | 196   | 0,747 | 0,408 | 0,784 | 0,861 | 6     | 0,315 | 0,307   | -0.543 | 0.684 | 0.512  |
| EMPA012 | 6    | 196   | 0,497 | 0,337 | 0,427 | 0,552 | 2     | 0,333 | 0,187   | -0.587 | 0.634 | 0.419  |
| EMPA06  | 12   | 205   | 0,81  | 0,737 | 0,710 | 0,711 | 1     | 0,083 | 0,042   | -0.713 | 0.477 | 0.104  |
| EMPA02  | 7    | 202   | 0,774 | 0,871 | 0,737 | 0,88  | 0     | ND    | -0,069  | -0.806 | 0.418 | -0.050 |
| EMPA10  | 10   | 205   | 0,748 | 0,785 | 0,710 | 0,954 | 3     | 0,300 | -0,027  | -0.765 | 0.439 | 0.010  |
| EMPA016 | 5    | 201   | 0,615 | 0,801 | 0,534 | 0,662 | 1     | 0,200 | -0,140  | -0.873 | 0.350 | -0.218 |
| EMPA13  | 7    | 206   | 0,538 | 0,583 | 0,438 | 0,623 | 1     | 0,143 | -0,045  | -0.817 | 0.458 | 0.016  |
| EMPA12  | 10   | 203   | 0,715 | 0,828 | 0,672 | 0,845 | 2     | 0,200 | -0,083  | -0.790 | 0.406 | -0.063 |
| EMPA01  | 9    | 197   | 0,736 | 0,843 | 0,687 | 0,722 | 3     | 0,333 | -0,077  | -0.806 | 0.473 | 0.049  |
| EMPA14  | 4    | 202   | 0,53  | 0,465 | 0,417 | 0,556 | 1     | 0,250 | 0,064   | -0.669 | 0.520 | 0.198  |
| Mean    | 9,20 | 200,7 | 0,639 | 0,625 | 0,585 | 0,722 | 0,233 | 0,238 | 0,032   | -0.740 | 0.507 | 0.137  |

**Supplementary Table S3. Statistical analysis' data obtained by genotyping both Campania's and International reference's 206 sweet cherry individuals corresponding to 113 cultivars, using the fifteen SSR microsatellite markers.**

For each locus, the allele number (k), the number of amplified samples (N), the expected (He) and observed (Ho) heterozygosity, the Polymorphic Index Content (PIC), Power Discrimination (PD), the private (P.A.)/total Alleles Richness Ratio (ARR), null alleles frequencies, F (Null), Inbreeding coefficient (Fis), Fixation Index (Fst) and Fit (Fitness) were calculated.
